# Supplementary material for: The Viromes of Mosquitoes from the Natural Landscapes of Western Siberia
Source: Viruses. 2023 Sep 8;15(9):1896. doi: 10.3390/v15091896 (PMC10537626; doi:10.3390/v15091896)
Supplement: Supplementary file 1 [file viruses-15-01896-s001.zip › viruses-2530126-supplementary.pdf]

# The Viromes of Mosquitoes from the Natural Landscapes of Western Siberia

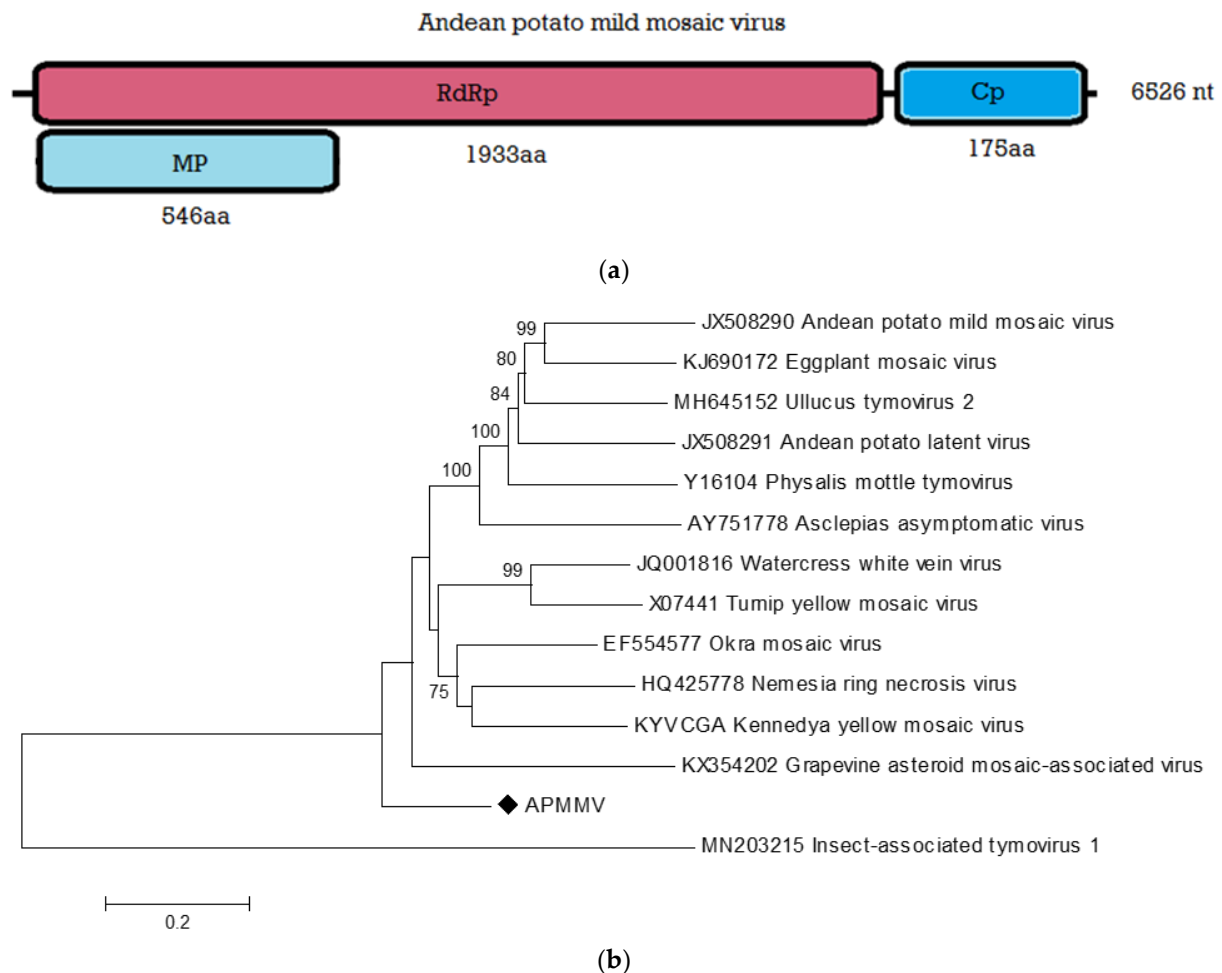

**Figure S1.** Andean potato mild mosaic virus (APMMV) as a novel Inya insect-associated virus 1 and 2. The APMMV are close to insect-associated tymovirus 1 and 2 (near 60% identity). (*Viruses*; *Riboviria*; *Orthornavirae*; *Kitrinoviricota*; *Alsuviricetes*; *Tymovirales*; unclassified *Tymovirales*.). (A) The scheme of genome organization for Insect-associated tymovirus 1; (B) The phylogenetic trees for RNA viruses for selected *Tymoviralis* and APMMV.

Partitivirus-like 1

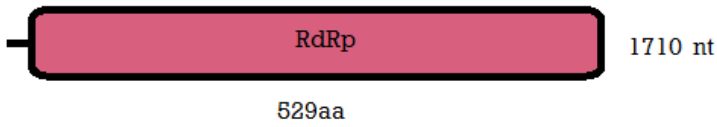

Atrato Partiti-like virus 2 segment 2

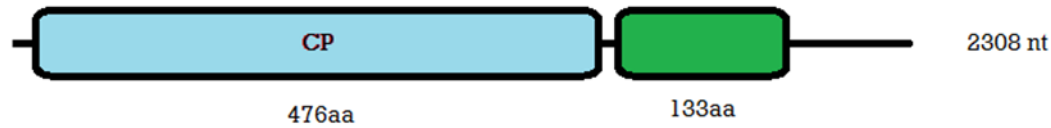

(a)

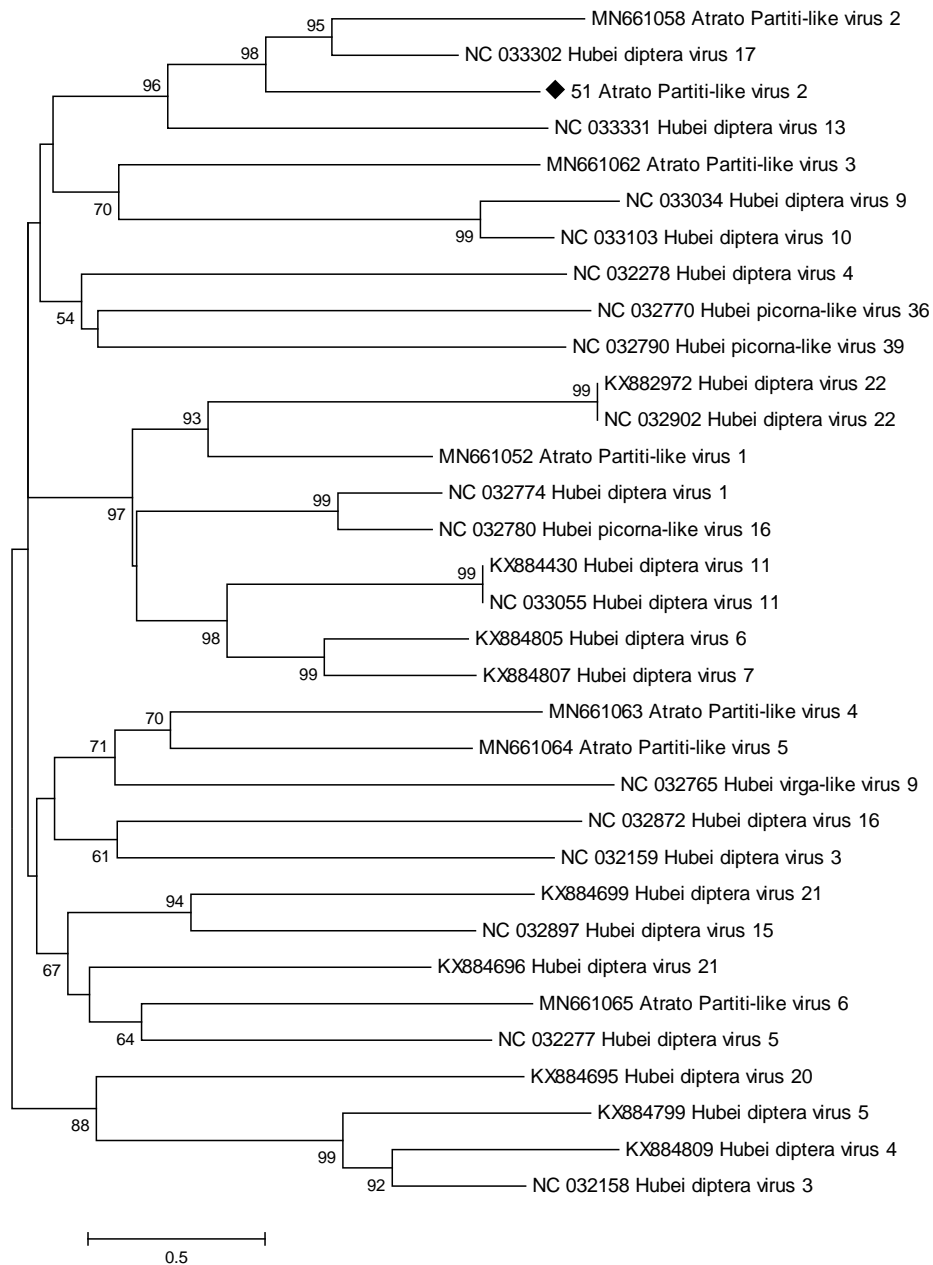

(b)

**Figure S2.** A novel virus with a 51% identity to Atrato Partiti-like virus 2 was detected in the *Anopheles messeae* pool and referred to as the Krahall insect-associated virus. (A) The scheme of genome organization for *Partitivirus*. (B) The phylogenetic relationship of *Partitivirus* with Atrato Partiti-like virus 2, based on the alignment of the RdRp and the putative scheme for the partitivirus genome.

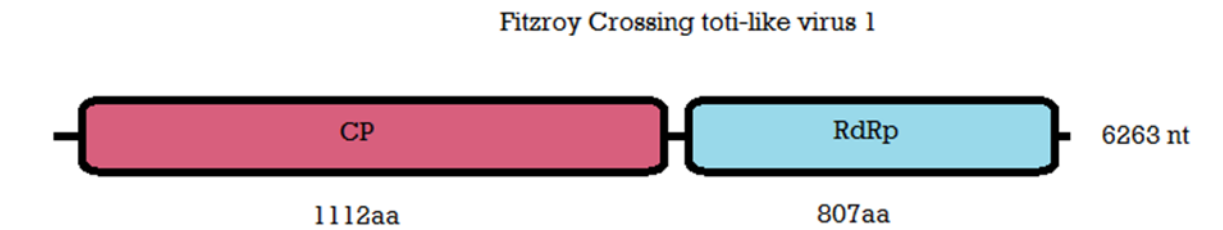

**Figure S3.** The scheme of genome organization for the Fitzroy Crossing toti-like virus 1.

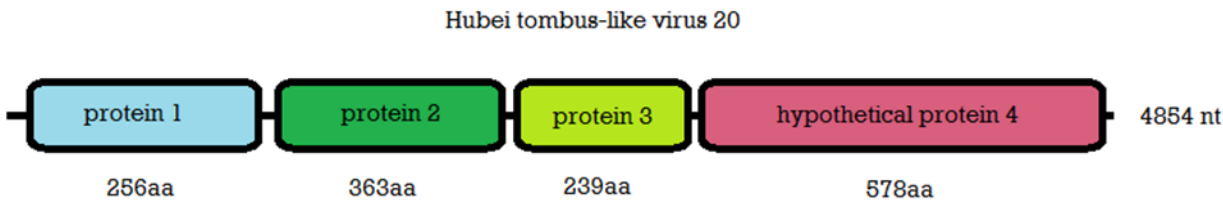

**Figure S4.** The scheme of genome organization for the Tombus-like virus. .

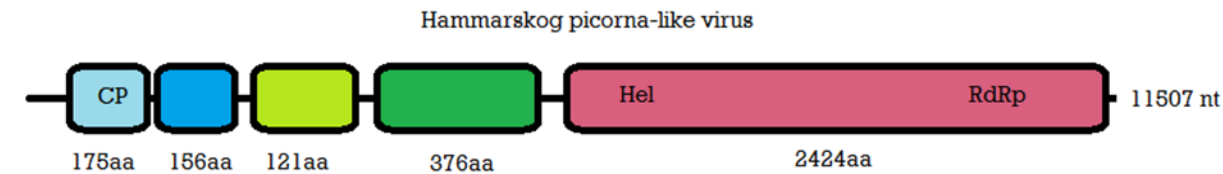

**Figure S5.** The genome organization for the picorna-like virus.

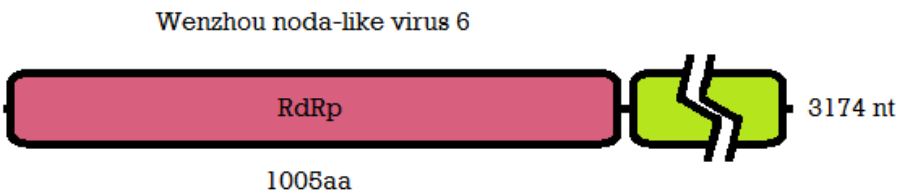

**Figure S6.** The genome organization for the nodaviruses (ssRNA).

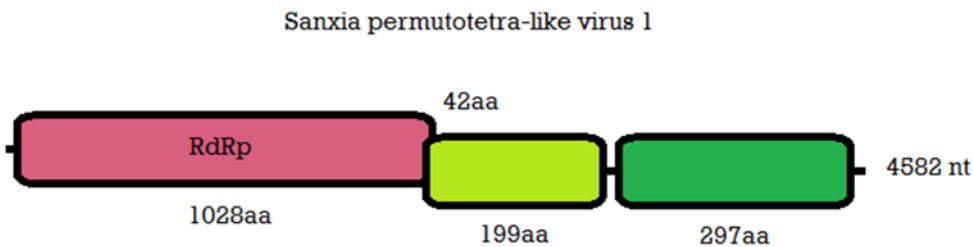

**Figure S7.** The genome organization for the permutotetraviruses.
